# Supplementary material
Source: publisher figshare collection journal article supplement (https://tandf.figshare.com/articles/dataset/_/12366662)

# checkCIF/PLATON report

You have not supplied any structure factors. As a result the full set of tests cannot be run.

THIS REPORT IS FOR GUIDANCE ONLY. IF USED AS PART OF A REVIEW PROCEDURE FOR PUBLICATION, IT SHOULD NOT REPLACE THE EXPERTISE OF AN EXPERIENCED CRYSTALLOGRAPHIC REFEREE.

No syntax errors found.      CIF dictionary      Interpreting this report

## Datablock: 123

---

Bond precision:    C-C = 0.0241 Å                      Wavelength=0.71069

Cell:                      a=19.366(5)              b=19.366(5)              c=18.436(5)  
                                alpha=90              beta=90              gamma=90  
Temperature:              293 K

|                        | Calculated                          | Reported                            |
|------------------------|-------------------------------------|-------------------------------------|
| Volume                 | 6914(4)                             | 6914(3)                             |
| Space group            | P 4/n                               | P 4/n                               |
| Hall group             | -P 4a                               | -P 4a                               |
| Moiety formula         | C150 H104 O25 Yb5, C2 Cl4, 2(C Cl2) | C150 H104 O25 Yb5, C2 Cl4, 2(C Cl2) |
| Sum formula            | C154 H104 Cl8 O25 Yb5               | C154 H104 Cl8 O25 Yb5               |
| Mr                     | 3503.17                             | 3503.17                             |
| Dx, g cm <sup>-3</sup> | 1.683                               | 1.683                               |
| Z                      | 2                                   | 2                                   |
| Mu (mm <sup>-1</sup> ) | 3.575                               | 3.575                               |
| F000                   | 3428.0                              | 3428.0                              |
| F000'                  | 3427.93                             |                                     |
| h,k,lmax               | 23,23,21                            | 23,23,21                            |
| Nref                   | 6100                                | 6100                                |
| Tmin,Tmax              | 0.422,0.628                         | 0.422,0.628                         |
| Tmin'                  | 0.329                               |                                     |

Correction method= MULTI-SCAN

Data completeness= 1.000                      Theta(max)= 25.000

R(reflections)= 0.0541( 4558)              wR2(reflections)= 0.1421( 6100)

S = 1.122                      Npar= 427

---

The following ALERTS were generated. Each ALERT has the format

**test-name\_ALERT\_alert-type\_alert-level.**

Click on the hyperlinks for more details of the test.

---

### ● Alert level B

|                   |                                       |                                        |        |        |
|-------------------|---------------------------------------|----------------------------------------|--------|--------|
| PLAT213_ALERT_2_B | Atom C12                              | has ADP max/min Ratio .....            | 4.6    | oblate |
| PLAT213_ALERT_2_B | Atom C36                              | has ADP max/min Ratio .....            | 4.7    | prolat |
| PLAT213_ALERT_2_B | Atom C37                              | has ADP max/min Ratio .....            | 5.0    | prolat |
| PLAT220_ALERT_2_B | Large Non-Solvent C                   | Ueq(max)/Ueq(min) Range                | 10.0   | Ratio  |
| PLAT222_ALERT_3_B | Large Non-Solvent H                   | Uiso(max)/Uiso(min) ..                 | 8.6    | Ratio  |
| PLAT241_ALERT_2_B | High                                  | Ueq as Compared to Neighbors for ..... | C16    | Check  |
| PLAT241_ALERT_2_B | High                                  | Ueq as Compared to Neighbors for ..... | C36    | Check  |
| PLAT242_ALERT_2_B | Low                                   | Ueq as Compared to Neighbors for ..... | C14    | Check  |
| PLAT342_ALERT_3_B | Low Bond Precision on C-C Bonds ..... |                                        | 0.0241 | Ang.   |
| PLAT369_ALERT_2_B | Long C(sp2)-C(sp2) Bond C14 - C16 ... |                                        | 1.57   | Ang.   |

---

### ● Alert level C

|                   |                                                  |                                        |      |              |
|-------------------|--------------------------------------------------|----------------------------------------|------|--------------|
| PLAT094_ALERT_2_C | Ratio of Maximum / Minimum Residual Density .... |                                        | 3.03 | Report       |
| PLAT147_ALERT_1_C | su on Symmetry Constrained Cell Angle(s) .....   |                                        |      | Please Check |
| PLAT202_ALERT_3_C | Isotropic non-H Atoms in Anion/Solvent .....     |                                        | 2    |              |
| PLAT213_ALERT_2_C | Atom C13                                         | has ADP max/min Ratio .....            | 3.4  | prolat       |
| PLAT213_ALERT_2_C | Atom C20                                         | has ADP max/min Ratio .....            | 3.6  | prolat       |
| PLAT213_ALERT_2_C | Atom C21                                         | has ADP max/min Ratio .....            | 3.9  | prolat       |
| PLAT213_ALERT_2_C | Atom C35                                         | has ADP max/min Ratio .....            | 3.6  | prolat       |
| PLAT221_ALERT_2_C | Large Solv./Anion C1                             | Ueq(max)/Ueq(min) Range                | 4.8  | Ratio        |
| PLAT230_ALERT_2_C | Hirshfeld Test Diff for C14 -- C38 ..            |                                        | 6.1  | su           |
| PLAT241_ALERT_2_C | High                                             | Ueq as Compared to Neighbors for ..... | C13  | Check        |
| PLAT241_ALERT_2_C | High                                             | Ueq as Compared to Neighbors for ..... | C21  | Check        |
| PLAT241_ALERT_2_C | High                                             | Ueq as Compared to Neighbors for ..... | C30  | Check        |
| PLAT241_ALERT_2_C | High                                             | Ueq as Compared to Neighbors for ..... | C31  | Check        |
| PLAT241_ALERT_2_C | High                                             | Ueq as Compared to Neighbors for ..... | C35  | Check        |
| PLAT242_ALERT_2_C | Low                                              | Ueq as Compared to Neighbors for ..... | 05   | Check        |
| PLAT242_ALERT_2_C | Low                                              | Ueq as Compared to Neighbors for ..... | C12  | Check        |
| PLAT242_ALERT_2_C | Low                                              | Ueq as Compared to Neighbors for ..... | C17  | Check        |
| PLAT242_ALERT_2_C | Low                                              | Ueq as Compared to Neighbors for ..... | C18  | Check        |
| PLAT242_ALERT_2_C | Low                                              | Ueq as Compared to Neighbors for ..... | C38  | Check        |
| PLAT244_ALERT_4_C | Low 'Solvent' Ueq as Compared to Neighbors of    |                                        | C98  | Check        |
| PLAT368_ALERT_2_C | Short C(sp2)-C(sp2) Bond C12 - C37 ...           |                                        | 1.18 | Ang.         |

---

### ● Alert level G

|                   |                                                  |              |       |             |
|-------------------|--------------------------------------------------|--------------|-------|-------------|
| PLAT002_ALERT_2_G | Number of Distance or Angle Restraints on AtSite |              | 3     | Note        |
| PLAT003_ALERT_2_G | Number of Uiso or Uij Restrained non-H Atoms ... |              | 8     | Report      |
| PLAT005_ALERT_5_G | No _iucr_refine_instructions_details in the CIF  |              |       | Please Do ! |
| PLAT083_ALERT_2_G | SHELXL Second Parameter in WGHT Unusually Large. |              | 98.75 | Why ?       |
| PLAT093_ALERT_1_G | No su's on H-positions, refinement reported as . |              |       | mixed       |
| PLAT199_ALERT_1_G | Reported _cell_measurement_temperature .....     | (K)          | 293   | Check       |
| PLAT200_ALERT_1_G | Reported _diffrn_ambient_temperature .....       | (K)          | 293   | Check       |
| PLAT301_ALERT_3_G | Main Residue Disorder .....                      | Percentage = | 1     | Note        |
| PLAT302_ALERT_4_G | Anion/Solvent Disorder .....                     | Percentage = | 47    | Note        |
| PLAT343_ALERT_2_G | Unusual sp? Angle Range in Main Residue for      |              | C38   | Che         |
| PLAT432_ALERT_2_G | Short Inter X...Y Contact C11 .. C97 ..          |              | 2.96  | Ang.        |
| PLAT432_ALERT_2_G | Short Inter X...Y Contact C12 .. C97 ..          |              | 2.45  | Ang.        |
| PLAT432_ALERT_2_G | Short Inter X...Y Contact C12 .. C42 ..          |              | 3.25  | Ang.        |
| PLAT432_ALERT_2_G | Short Inter X...Y Contact C21 .. C98 ..          |              | 3.05  | Ang.        |
| PLAT432_ALERT_2_G | Short Inter X...Y Contact C97 .. C97 ..          |              | 3.12  | Ang.        |
| PLAT432_ALERT_2_G | Short Inter X...Y Contact C97 .. C97 ..          |              | 3.12  | Ang.        |
| PLAT764_ALERT_4_G | Overcomplete CIF Bond List Detected (Rep/Expd) . |              | 1.14  | Ratio       |
| PLAT779_ALERT_4_G | Suspect or Irrelevant (Bond) Angle in CIF .... # |              | 196   | Check       |
|                   | C97 -CL1 -CL2 1.555 1.555 1.555                  |              | 29.00 | Deg.        |
| PLAT790_ALERT_4_G | Centre of Gravity not Within Unit Cell: Resd. #  |              | 2     | Note        |
|                   | C2 C14                                           |              |       |             |
| PLAT790_ALERT_4_G | Centre of Gravity not Within Unit Cell: Resd. #  |              | 3     | Note        |
|                   | C C12                                            |              |       |             |

---

0 **ALERT level A** = Most likely a serious problem - resolve or explain  
 10 **ALERT level B** = A potentially serious problem, consider carefully  
 21 **ALERT level C** = Check. Ensure it is not caused by an omission or oversight  
 22 **ALERT level G** = General information/check it is not something unexpected

4 ALERT type 1 CIF construction/syntax error, inconsistent or missing data  
 36 ALERT type 2 Indicator that the structure model may be wrong or deficient  
 5 ALERT type 3 Indicator that the structure quality may be low  
 7 ALERT type 4 Improvement, methodology, query or suggestion  
 1 ALERT type 5 Informative message, check

---

It is advisable to attempt to resolve as many as possible of the alerts in all categories. Often the minor alerts point to easily fixed oversights, errors and omissions in your CIF or refinement strategy, so attention to these fine details can be worthwhile. In order to resolve some of the more serious problems it may be necessary to carry out additional measurements or structure refinements. However, the purpose of your study may justify the reported deviations and the more serious of these should normally be commented upon in the discussion or experimental section of a paper or in the "special\_details" fields of the CIF. checkCIF was carefully designed to identify outliers and unusual parameters, but every test has its limitations and alerts that are not important in a particular case may appear. Conversely, the absence of alerts does not guarantee there are no aspects of the results needing attention. It is up to the individual to critically assess their own results and, if necessary, seek expert advice.

### Publication of your CIF in IUCr journals

A basic structural check has been run on your CIF. These basic checks will be run on all CIFs submitted for publication in IUCr journals (*Acta Crystallographica*, *Journal of Applied Crystallography*, *Journal of Synchrotron Radiation*); however, if you intend to submit to *Acta Crystallographica Section C* or *E*, you should make sure that full publication checks are run on the final version of your CIF prior to submission.

### Publication of your CIF in other journals

Please refer to the *Notes for Authors* of the relevant journal for any special instructions relating to CIF submission.

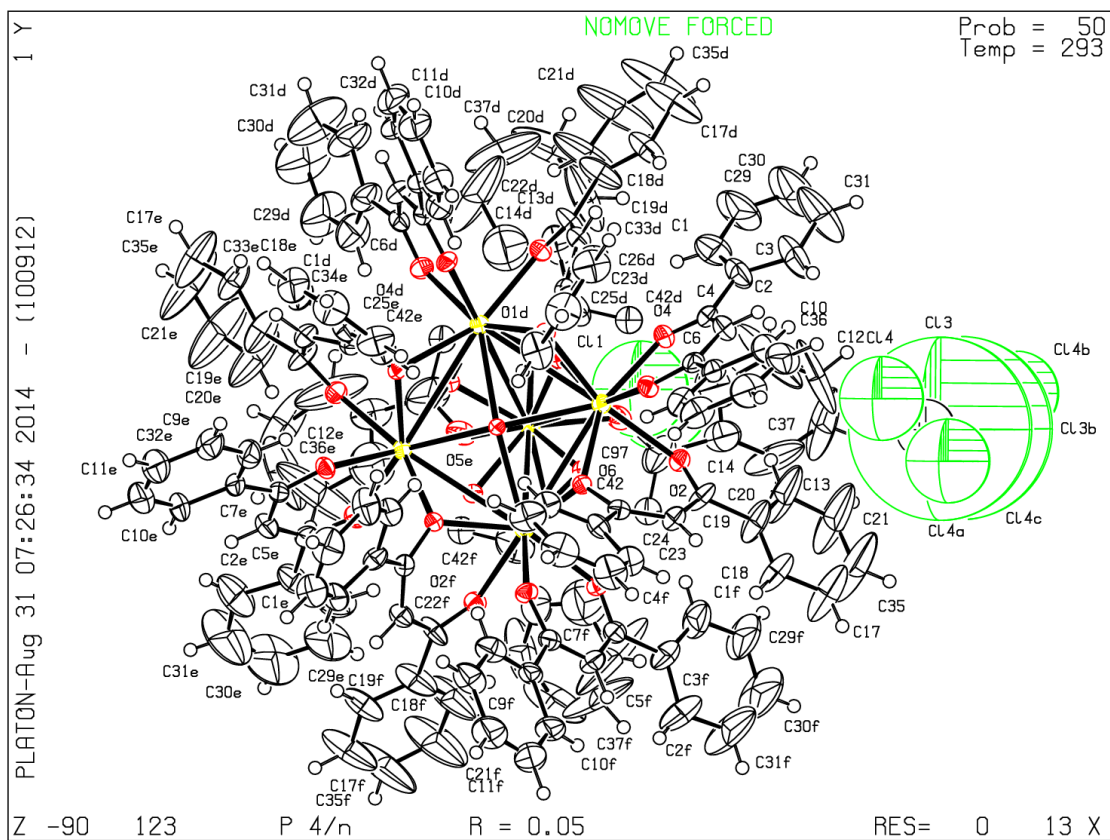

Supplement: Supplementary file 1 [file 1]
