# Supplementary material
Source: publisher figshare collection journal article supplement (https://tandf.figshare.com/articles/dataset/_/12366662)

# checkCIF/PLATON report

You have not supplied any structure factors. As a result the full set of tests cannot be run.

THIS REPORT IS FOR GUIDANCE ONLY. IF USED AS PART OF A REVIEW PROCEDURE FOR PUBLICATION, IT SHOULD NOT REPLACE THE EXPERTISE OF AN EXPERIENCED CRYSTALLOGRAPHIC REFEREE.

No syntax errors found.      CIF dictionary      Interpreting this report

## Datablock: 123

---

Bond precision:    C-C = 0.0392 Å                      Wavelength=0.71069

Cell:                      a=19.503(5)              b=19.503(5)              c=18.892(5)  
                                alpha=90              beta=90              gamma=90  
Temperature:              293 K

|                | Calculated               | Reported                 |
|----------------|--------------------------|--------------------------|
| Volume         | 7186(4)                  | 7186(3)                  |
| Space group    | P 4/n                    | P 4/n                    |
| Hall group     | -P 4a                    | -P 4a                    |
| Moiety formula | C152 H108 O25 Tb5, C Cl2 | C152 H108 O25 Tb5, C Cl2 |
| Sum formula    | C153 H108 Cl2 O25 Tb5    | C153 H108 Cl2 O25 Tb5    |
| Mr             | 3211.94                  | 3211.94                  |
| Dx,g cm-3      | 1.484                    | 1.484                    |
| Z              | 2                        | 2                        |
| Mu (mm-1)      | 2.533                    | 2.533                    |
| F000           | 3170.0                   | 3170.0                   |
| F000'          | 3170.11                  |                          |
| h,k,lmax       | 23,23,22                 | 23,23,22                 |
| Nref           | 6355                     | 6355                     |
| Tmin,Tmax      | 0.533,0.719              | 0.533,0.719              |
| Tmin'          | 0.463                    |                          |

Correction method= MULTI-SCAN

Data completeness= 1.000                      Theta(max)= 25.000

R(reflections)= 0.0752( 3947)              wR2(reflections)= 0.2094( 6355)

S = 1.073                      Npar= 415

---

The following ALERTS were generated. Each ALERT has the format  
**test-name\_ALERT\_alert-type\_alert-level.**  
Click on the hyperlinks for more details of the test.

---

## 🔴 Alert level B

SHFSU01\_ALERT\_2\_B The absolute value of parameter shift to su ratio > 0.10  
Absolute value of the parameter shift to su ratio given 0.108  
Additional refinement cycles may be required.

|                   |                                                |             |
|-------------------|------------------------------------------------|-------------|
| PLAT080_ALERT_2_B | Maximum Shift/Error .....                      | 0.11        |
| PLAT201_ALERT_2_B | Isotropic non-H Atoms in Main Residue(s) ..... | 1 Report    |
| PLAT241_ALERT_2_B | High Ueq as Compared to Neighbors for .....    | C33 Check   |
| PLAT242_ALERT_2_B | Low Ueq as Compared to Neighbors for .....     | 09 Check    |
| PLAT342_ALERT_3_B | Low Bond Precision on C-C Bonds .....          | 0.0392 Ang. |
| PLAT367_ALERT_2_B | Long? C(sp?)-C(sp?) Bond C33 - C50 ...         | 1.71 Ang.   |
| PLAT369_ALERT_2_B | Long C(sp2)-C(sp2) Bond C33 - C36 ...          | 1.59 Ang.   |

---

## 🟡 Alert level C

|                   |                                                  |              |
|-------------------|--------------------------------------------------|--------------|
| PLAT094_ALERT_2_C | Ratio of Maximum / Minimum Residual Density .... | 3.36 Report  |
| PLAT147_ALERT_1_C | su on Symmetry Constrained Cell Angle(s) .....   | Please Check |
| PLAT202_ALERT_3_C | Isotropic non-H Atoms in Anion/Solvent .....     | 2            |
| PLAT213_ALERT_2_C | Atom Cl6 has ADP max/min Ratio .....             | 3.6 prolat   |
| PLAT220_ALERT_2_C | Large Non-Solvent C Ueq(max)/Ueq(min) Range      | 5.2 Ratio    |
| PLAT230_ALERT_2_C | Hirshfeld Test Diff for 09 -- C33 ..             | 7.0 su       |
| PLAT234_ALERT_4_C | Large Hirshfeld Difference 04 -- C6 ..           | 0.17 Ang.    |
| PLAT234_ALERT_4_C | Large Hirshfeld Difference C22 -- C23 ..         | 0.19 Ang.    |
| PLAT234_ALERT_4_C | Large Hirshfeld Difference C23 -- C28 ..         | 0.20 Ang.    |
| PLAT241_ALERT_2_C | High Ueq as Compared to Neighbors for .....      | C2 Check     |
| PLAT241_ALERT_2_C | High Ueq as Compared to Neighbors for .....      | C7 Check     |
| PLAT241_ALERT_2_C | High Ueq as Compared to Neighbors for .....      | C16 Check    |
| PLAT241_ALERT_2_C | High Ueq as Compared to Neighbors for .....      | C30 Check    |
| PLAT242_ALERT_2_C | Low Ueq as Compared to Neighbors for .....       | C4 Check     |
| PLAT242_ALERT_2_C | Low Ueq as Compared to Neighbors for .....       | C5 Check     |
| PLAT242_ALERT_2_C | Low Ueq as Compared to Neighbors for .....       | C20 Check    |
| PLAT244_ALERT_4_C | Low 'Solvent' Ueq as Compared to Neighbors of    | C98 Check    |
| PLAT368_ALERT_2_C | Short C(sp2)-C(sp2) Bond C48 - C49 ...           | 1.18 Ang.    |
| PLAT601_ALERT_2_C | Structure Contains Solvent Accessible VOIDS of . | 100 Ang3     |

---

## 🟢 Alert level G

|                   |                                                  |              |
|-------------------|--------------------------------------------------|--------------|
| PLAT002_ALERT_2_G | Number of Distance or Angle Restraints on AtSite | 3 Note       |
| PLAT003_ALERT_2_G | Number of Uiso or Uij Restrained non-H Atoms ... | 14 Report    |
| PLAT005_ALERT_5_G | No _iucr_refine_instructions_details in the CIF  | Please Do !  |
| PLAT083_ALERT_2_G | SHELXL Second Parameter in WGHT Unusually Large. | 134.90 Why ? |
| PLAT093_ALERT_1_G | No su's on H-positions, refinement reported as . | mixed        |
| PLAT199_ALERT_1_G | Reported _cell_measurement_temperature .....     | 293 Check    |
| PLAT200_ALERT_1_G | Reported _diffrn_ambient_temperature .....       | 293 Check    |
| PLAT302_ALERT_4_G | Anion/Solvent Disorder .....                     | 33 Note      |
| PLAT343_ALERT_2_G | Unusual sp? Angle Range in Main Residue for      | C50 Che      |
| PLAT764_ALERT_4_G | Overcomplete CIF Bond List Detected (Rep/Expd) . | 1.22 Ratio   |
| PLAT790_ALERT_4_G | Centre of Gravity not Within Unit Cell: Resd. #  | 2 Note       |
|                   | C Cl2                                            |              |
| PLAT860_ALERT_3_G | Number of Least-Squares Restraints .....         | 253 Note     |
| PLAT899_ALERT_4_G | SHELXL97 is Deprecated and Succeeded by SHELXL   | 2014 Note    |

---

- 0 **ALERT level A** = Most likely a serious problem - resolve or explain  
8 **ALERT level B** = A potentially serious problem, consider carefully  
19 **ALERT level C** = Check. Ensure it is not caused by an omission or oversight  
13 **ALERT level G** = General information/check it is not something unexpected
- 4 ALERT type 1 CIF construction/syntax error, inconsistent or missing data

24 ALERT type 2 Indicator that the structure model may be wrong or deficient  
3 ALERT type 3 Indicator that the structure quality may be low  
8 ALERT type 4 Improvement, methodology, query or suggestion  
1 ALERT type 5 Informative message, check

---

It is advisable to attempt to resolve as many as possible of the alerts in all categories. Often the minor alerts point to easily fixed oversights, errors and omissions in your CIF or refinement strategy, so attention to these fine details can be worthwhile. In order to resolve some of the more serious problems it may be necessary to carry out additional measurements or structure refinements. However, the purpose of your study may justify the reported deviations and the more serious of these should normally be commented upon in the discussion or experimental section of a paper or in the "special\_details" fields of the CIF. checkCIF was carefully designed to identify outliers and unusual parameters, but every test has its limitations and alerts that are not important in a particular case may appear. Conversely, the absence of alerts does not guarantee there are no aspects of the results needing attention. It is up to the individual to critically assess their own results and, if necessary, seek expert advice.

### **Publication of your CIF in IUCr journals**

A basic structural check has been run on your CIF. These basic checks will be run on all CIFs submitted for publication in IUCr journals (*Acta Crystallographica*, *Journal of Applied Crystallography*, *Journal of Synchrotron Radiation*); however, if you intend to submit to *Acta Crystallographica Section C* or *E*, you should make sure that full publication checks are run on the final version of your CIF prior to submission.

### **Publication of your CIF in other journals**

Please refer to the *Notes for Authors* of the relevant journal for any special instructions relating to CIF submission.

---

**PLATON version of 20/08/2014; check.def file version of 18/08/2014**

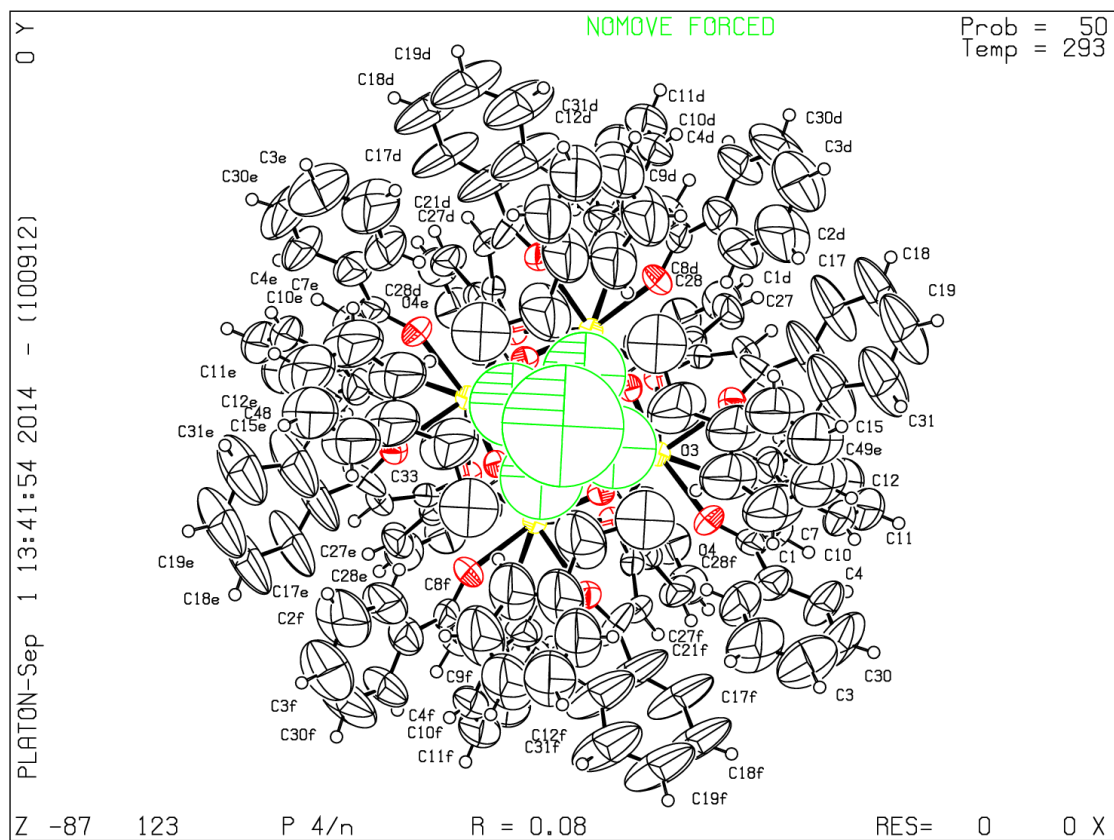

Supplement: Supplementary file 2 [file 1]
