# Supplementary material
Source: publisher figshare collection journal article supplement (https://tandf.figshare.com/articles/dataset/_/12366662)
Supplement: Supplementary file 3 [file 1]

Archive with 2 entries (2 files):
- lsrt_a_1769659_sm3025.pdf
- lsrt_a_1769659_sm3022.pdf
